# Supplementary material for: Association between the quality of plant-based diets and risk of thyroid dysfunction
Source: Royal Society of Chemistry journal article supplement (doi:10.1039/d4fo04287e), 2025-01-01
Supplement: d4fo04287e1.pdf [file d4fo04287e1.pdf]

## **Supplement Content:**

**Table S1.** Example of food items and scoring for plant-based diet indices in 17 food groups

**Table S2.** Participant characteristics by thyroid dysfunction at baseline in UK Biobank (n = 199,382)

**Table S3.** Participant characteristics by hypothyroidism at baseline in UK Biobank (n = 200,446)

**Table S4.** Participant characteristics by hyperthyroidism at baseline in UK Biobank (n = 200,166)

**Table S5.** Sensitivity analyses of the associations of plant-based diet indices with the risk of thyroid dysfunction

**Figure S1.** Flow chart of participants included in the present UK Biobank

**Figure S2.** Restrict cubic spline for the associations of the three plant-based diet indices with the risk of hypothyroidism and hyperthyroidism

**Table S1:** Example of food items and scoring for plant-based diet indices in 17 food groups

| Food groups                | Food items                                                                                                                                                                                                                                          | Scoring for overall PDI | Scoring for hPDI | Scoring for uPDI |
|----------------------------|-----------------------------------------------------------------------------------------------------------------------------------------------------------------------------------------------------------------------------------------------------|-------------------------|------------------|------------------|
| <b>Healthy plant foods</b> |                                                                                                                                                                                                                                                     |                         |                  |                  |
| Whole grains               | Porridge, muesli, plain cereal, bran cereal, whole-wheat cereal, oatcakes, whole meal bread (flour type: whole meal), whole meal pasta, brown rice, couscous, other cooked grains (such as bulgur)                                                  | Positive                | Positive         | Reverse          |
| Fruits                     | Stewed fruit, prune, dried fruit, mixed fruit, apple, banana, berries, cherries, grapefruit, grapes, mango, melon, orange, orange-like small fruits, peach/nectarine, pear, pineapple, plum, other fruits, olives                                   | Positive                | Positive         | Reverse          |
| Vegetables                 | Mixed vegetables, vegetable pieces, coleslaw, side salad, avocado, beetroot, broccoli, butternut squash, cabbage/kale, carrots, cauliflower, celery, courgetti, cucumber, garlic, leeks, lettuce, mushrooms, onion, parsnip, sweet peppers, spinach | Positive                | Positive         | Reverse          |
|                            | sprouts, sweetcorn, fresh tomatoes, cooked or tinned tomatoes, turnip/swede, watercress, other vegetable intake                                                                                                                                     |                         |                  |                  |
| Nuts                       | Salted peanuts, unsalted peanuts, salted nuts, unsalted nuts, seeds                                                                                                                                                                                 | Positive                | Positive         | Reverse          |
| Legumes                    | Vegetarian sausages/burgers, tofu, quorn, other vegetarian alternative, baked                                                                                                                                                                       | Positive                | Positive         | Reverse          |

|                                 |                                                                                                                                                                                                                                                                                                                                                             |          |          |          |
|---------------------------------|-------------------------------------------------------------------------------------------------------------------------------------------------------------------------------------------------------------------------------------------------------------------------------------------------------------------------------------------------------------|----------|----------|----------|
|                                 | beans, pulse, broad beans, green beans, peas                                                                                                                                                                                                                                                                                                                |          |          |          |
| Tea and coffee                  | Instant coffee, filtered coffee, cappuccino, latte, espresso, other coffee drinks, standard tea, rooibos tea, green tea, herbal tea, other tea, low calorie hot chocolate, hot chocolate                                                                                                                                                                    | Positive | Positive | Reverse  |
| <b>Less healthy plant foods</b> |                                                                                                                                                                                                                                                                                                                                                             |          |          |          |
| Refined grains                  | Oat crunch, sweetened cereal, other cereal, white bread (flour types: white, mix, and others), naan bread, garlic bread, crispbread, other bread, white pasta, white rice, snackpot, couscous, pancake, scotch pancake, croissant, scone, savoury biscuits, cheesy biscuits, sweet potato, other savoury snack                                              | Positive | Reverse  | Positive |
| Potatoes                        | Fried potatoes, boiled/baked potatoes, mashed potatoes, crisps (e.g., potato chips)                                                                                                                                                                                                                                                                         | Positive | Reverse  | Positive |
| Sugary drinks                   | Low calorie or diet drinks (e.g. fizzy, squash), carbonated (fizzy) drinks, squash or cordial                                                                                                                                                                                                                                                               | Positive | Reverse  | Positive |
| Fruit juices                    | Orange juice, grapefruit juice, other fruit/vegetable juice, fruit smoothie                                                                                                                                                                                                                                                                                 | Positive | Reverse  | Positive |
| Sweets and desserts             | Double crust pie, single crust pie/flan, crumble topping, Yorkshire pudding, Danish pastry, fruitcake, cake, doughnuts, sponge pudding, other dessert, chocolate bar, white chocolate, milk chocolate, dark chocolate, chocolate-covered raisin, chocolate sweet, diet sweets, chocolate-covered biscuits, chocolate biscuits, sweet biscuits, other sweets | Positive | Reverse  | Positive |

| <b>Animal-based food groups</b>  |                                                                                                                                                                                                                                                                                                 |         |         |         |
|----------------------------------|-------------------------------------------------------------------------------------------------------------------------------------------------------------------------------------------------------------------------------------------------------------------------------------------------|---------|---------|---------|
| Animal fat                       | Butter on bread/crackers (spreadable, low fat, normal fat, or unknown type), dairy spread on bread/crackers (very low fat, low fat, normal fat, unknown type)                                                                                                                                   | Reverse | Reverse | Reverse |
| Dairy                            | Milk, dairy smoothie, flavored milk, yogurt, ice-cream, cheesecake, milk-based pudding, other milk-based pudding, low fat hard cheese, hard cheese, soft cheese, blue cheese, low fat cheese spread, cheese spread, cottage cheese, feta cheese, mozzarella cheese, goat's cheese, other cheese | Reverse | Reverse | Reverse |
| <b>Animal-based food groups</b>  |                                                                                                                                                                                                                                                                                                 |         |         |         |
| Eggs                             | Whole eggs, omelettes or scrambled egg, eggs in sandwiches, scotch egg, other egg dishes                                                                                                                                                                                                        | Reverse | Reverse | Reverse |
| Fish or seafood                  | Tinned tuna, oily fish, breaded fish, battered fish, white fish, prawns, lobster/crab, shellfish, other fish intake                                                                                                                                                                             | Reverse | Reverse | Reverse |
| Meat                             | Sausage, beef, pork, lamb, crumbed or deep-fried poultry, poultry, bacon, ham, liver, other meat intake                                                                                                                                                                                         | Reverse | Reverse | Reverse |
| Miscellaneous animal-based foods | Pizza, Indian snacks                                                                                                                                                                                                                                                                            | Reverse | Reverse | Reverse |

Abbreviations: PDI, plant-based diet index; hPDI, healthful plant-based diet index; uPDI, unhealthful plant-based diet index.

**Table S2.** Participant characteristics by thyroid dysfunction at baseline in UK Biobank (n = 199,382)

| Characteristics                             | Non thyroid dysfunction     | Thyroid dysfunction      |
|---------------------------------------------|-----------------------------|--------------------------|
| Age (years)                                 | 56 (50, 62) <sup>a</sup>    | 58 (52, 64)              |
| Male, n (%)                                 | 91,639 (47.0)               | 1,245 (29.1)             |
| Education, n (%)                            |                             |                          |
| College or university                       | 28,819 (14.8)               | 566 (13.2)               |
| Vocational                                  | 45,596 (23.4)               | 1,009 (23.6)             |
| Upper secondary                             | 11,855 (6.08)               | 279 (6.51)               |
| Lower secondary                             | 26,374 (13.5)               | 551 (12.9)               |
| Others                                      | 65,344 (33.5)               | 1,331 (31.1)             |
| Unknown                                     | 17,111 (8.77)               | 547 (12.8)               |
| TDI                                         | -2.32 (-3.73, 0.08)         | -2.15 (-3.60, 0.32)      |
| Household income, n (%)                     |                             |                          |
| ≥31,000                                     | 68,719 (39.2)               | 1,871 (50.1)             |
| <31,000                                     | 106,489 (60.8)              | 1,867 (50.0)             |
| PM <sub>2.5</sub> (micro-g/m <sup>3</sup> ) | 9.87 (9.23, 10.5)           | 9.91 (9.28, 10.5)        |
| Total energy intake (kJ/d)                  | 8,360.9 (6,770.7, 10,233.1) | 8,014 (6,491.9, 9,830.7) |
| BMI (kg/m <sup>2</sup> )                    | 26.2 (23.7, 29.2)           | 27.1 (24.3, 30.8)        |
| Current smoker, n (%)                       | 15,388 (7.89)               | 392 (9.15)               |
| Current drinker, n (%)                      | 183,094 (93.9)              | 3,849 (89.9)             |
| PA (MET × hour/week)                        | 1,733.0 (817.0, 3,324.0)    | 1,638.0 (712.5, 3,135.0) |
| Individual history of diseases, n (%)       |                             |                          |
| Hypertension                                | 125,906 (64.5)              | 2,197 (51.3)             |
| Diabetes                                    | 65,975 (33.8)               | 2,002 (46.7)             |

**Table S2.** Participant characteristics by thyroid dysfunction at baseline in UK Biobank (n = 199,382) (continued form)

| Characteristics               | Non thyroid dysfunction | Thyroid dysfunction |
|-------------------------------|-------------------------|---------------------|
| Hyperlipemia                  | 3,218 (1.65)            | 84.0 (1.96)         |
| Iodine intake                 | 183.7 (136.2, 246.1)    | 179 (133.9, 242.5)  |
| Plant-based diet index, n (%) |                         |                     |
| PDI                           | 51 (47, 54)             | 51 (47, 55)         |
| hPDI                          | 55 (50, 59)             | 55 (51, 59)         |
| uPDI                          | 55 (51, 59)             | 55 (51, 59)         |

Abbreviation: BMI, body mass index; hPDI, healthful plant-based diet index; MET, metabolic equivalent of task; PA, physical activity; PDI, overall plant-based diet index; TDI, Townsend deprivation index; uPDI, unhealthful plant-based diet index.

<sup>a</sup>Continuous variables are expressed as medians (P25, P75) and categorical variables are expressed as n (%).

**Table S3.** Participant characteristics by hypothyroidism at baseline in UK Biobank (n = 200,446)

| Characteristics                             | Non hypothyroidism          | Hypothyroidism             |
|---------------------------------------------|-----------------------------|----------------------------|
| Age (years)                                 | 57 (50, 62) <sup>a</sup>    | 59 (53, 64)                |
| Male, n (%)                                 | 91,919 (46.8)               | 1,158 (28.3)               |
| Education, n (%)                            |                             |                            |
| College or university                       | 28,986 (14.8)               | 537 (13.1)                 |
| Vocational                                  | 45,898 (23.4)               | 939 (23.0)                 |
| Upper secondary                             | 11,940 (6.08)               | 259 (6.34)                 |
| Lower secondary                             | 26,528 (13.5)               | 536 (13.1)                 |
| Others                                      | 65,765 (33.5)               | 1,282 (31.4)               |
| Unknown                                     | 17,243 (8.78)               | 533 (13.0)                 |
| TDI                                         | -2.32 (-3.73, 0.08)         | -2.15 (-3.60, 0.30)        |
| Household income, n (%)                     |                             |                            |
| ≥31,000                                     | 69,204 (39.3)               | 1,808 (51.0)               |
| <31,000                                     | 107,133 (60.8)              | 1,735 (49.0)               |
| PM <sub>2.5</sub> (micro-g/m <sup>3</sup> ) | 9.87 (9.23, 10.5)           | 9.92 (9.27, 10.5)          |
| Total energy intake (kJ/d)                  | 8,359.6 (6,769.8, 10,230.5) | 8,002.7 (6,453.3, 9,807.3) |
| BMI (kg/m <sup>2</sup> )                    | 26.2 (23.7, 29.2)           | 27.2 (24.3, 30.9)          |
| Current smoker, n (%)                       | 15,388 (7.89)               | 392 (9.15)                 |
| Current drinker, n (%)                      | 183,094 (93.9)              | 3,849 (89.9)               |
| PA (MET × hour/week)                        | 1,732.5 (817.0, 3,324.0)    | 1,687.5 (720.0, 3,252.0)   |
| Individual history of diseases, n (%)       |                             |                            |
| Hypertension                                | 126,570 (64.5)              | 2,007 (49.1)               |

**Table S3.** Participant characteristics by hypothyroidism at baseline in UK Biobank (n = 200,446) (continued form)

| Characteristics        | Non hypothyroidism   | Hypothyroidism       |
|------------------------|----------------------|----------------------|
| Diabetes               | 66,544 (33.9)        | 1,998 (48.9)         |
| Hyperlipemia           | 3,246 (1.65)         | 81.0 (1.98)          |
| Iodine intake          | 183.7 (136.1, 246.0) | 179.6 (134.0, 243.1) |
| Plant-based diet index |                      |                      |
| PDI                    | 51 (47, 54)          | 51 (47, 55)          |
| hPDI                   | 55 (50, 59)          | 55 (51, 59)          |
| uPDI                   | 55 (51, 59)          | 55 (51, 59)          |

Abbreviation: BMI, body mass index; hPDI, healthful plant-based diet index; MET, metabolic equivalent of task; PA, physical activity; PDI, overall plant-based diet index; TDI, Townsend deprivation index; uPDI, unhealthful plant-based diet index.

<sup>a</sup>Continuous variables are expressed as medians (P25, P75) and categorical variables are expressed as n (%).

**Table S4.** Participant characteristics by hyperthyroidism at baseline in UK Biobank (n = 200,166)

| Characteristics                             | Non hyperthyroidism         | Hyperthyroidism          |
|---------------------------------------------|-----------------------------|--------------------------|
| Age (years)                                 | 57 (50, 63) <sup>a</sup>    | 59 (52, 64)              |
| Male, n (%)                                 | 94,189 (45.2)               | 233 (24.9)               |
| Education, n (%)                            |                             |                          |
| College or university                       | 30,456 (14.6)               | 104 (11.1)               |
| Vocational                                  | 48,671 (23.4)               | 224 (24.0)               |
| Upper secondary                             | 12,633 (6.07)               | 68 (7.27)                |
| Lower secondary                             | 27,946 (13.4)               | 112 (12.0)               |
| Others                                      | 69,725 (33.5)               | 294 (31.4)               |
| Unknown                                     | 18,800 (9.03)               | 133 (14.2)               |
| TDI                                         | -2.32 (-3.73, 0.08)         | -2.07 (-3.51, 0.75)      |
| Household income, n (%)                     |                             |                          |
| ≥31,000                                     | 74,362 (39.9)               | 461 (55.1)               |
| <31,000                                     | 112,215 (60.1)              | 375 (44.9)               |
| PM <sub>2.5</sub> (micro-g/m <sup>3</sup> ) | 9.87 (9.23, 10.5)           | 9.93 (9.33, 10.5)        |
| Total energy intake (kJ/d)                  | 8,331.1 (6,745.9, 10,198.8) | 8,099 (6,565.9, 9,831.8) |
| BMI (kg/m <sup>2</sup> )                    | 26.3 (23.8, 29.3)           | 26.9 (24.0, 30.7)        |
| Current smoker, n (%)                       | 16,293 (7.82)               | 107 (11.4)               |
| Current drinker, n (%)                      | 194,956 (93.6)              | 854 (91.3)               |
| PA (MET × hour/week)                        | 1,727 (813, 3,318)          | 1,455 (648, 2,817)       |
| Individual history of diseases, n (%)       |                             |                          |
| Hypertension                                | 131,358 (63.1)              | 440 (47.1)               |
| Diabetes                                    | 73,353 (35.2)               | 469 (50.2)               |

**Table S4.** Participant characteristics by hyperthyroidism at baseline in UK Biobank (n = 200,166) (continued form)

| Characteristics          | Non hyperthyroidism  | Hyperthyroidism      |
|--------------------------|----------------------|----------------------|
| Hyperlipemia             | 3,520 (1.69)         | 26 (2.78)            |
| Iodine                   | 184.0 (136.0, 245.9) | 176.4 (129.2, 240.0) |
| Plant-based diet incides |                      |                      |
| PDI                      | 51 (47, 54)          | 51 (47, 54)          |
| hPDI                     | 55 (50, 59)          | 55 (50, 59)          |
| uPDI                     | 55 (51, 59)          | 55 (51, 59)          |

Abbreviation: BMI, body mass index; hPDI, healthful plant-based diet index; MET, metabolic equivalent of task; PA, physical activity; PDI, overall plant-based diet index; TDI, Townsend deprivation index; uPDI, unhealthful plant-based diet index.

<sup>a</sup>Continuous variables are expressed as medians (P25, P75) and categorical variables are expressed as n (%).

**Table S5** Sensitivity analyses of the associations of plant-based diet indices with the risk of thyroid dysfunction

|                                                               | Cases/Participants |              |              | Hazard ratio (95% confidence interval) <sup>a</sup> |                   |                   |                    |                   |
|---------------------------------------------------------------|--------------------|--------------|--------------|-----------------------------------------------------|-------------------|-------------------|--------------------|-------------------|
|                                                               | Tertile 1          | Tertile 2    | Tertile 3    | Tertile 1                                           | Tertile 2         | Tertile 3         | <i>P</i> for trend | Per SD increase   |
| 1) excluding participants with less than 2 years of follow-up |                    |              |              |                                                     |                   |                   |                    |                   |
| <b>PDI</b>                                                    |                    |              |              |                                                     |                   |                   |                    |                   |
| TD                                                            | 69,555/1,359       | 56,204/1,105 | 73,062/1,561 | 1.00 (ref.)                                         | 0.96 (0.89, 1.04) | 1.01 (0.94, 1.09) | 0.389              | 1.00 (0.97, 1.04) |
| Hypothyroidism                                                | 69,901/1,276       | 56,506/1,047 | 73,475/1,505 | 1.00 (ref.)                                         | 0.97 (0.90, 1.06) | 1.05 (0.97, 1.14) | 0.193              | 1.01 (0.98, 1.05) |
| Hyperthyroidism                                               | 72,712/301         | 59,088/259   | 76,971/301   | 1.00 (ref.)                                         | 1.02 (0.86, 1.21) | 0.88 (0.75, 1.04) | 0.127              | 0.96 (0.89, 1.03) |
| <b>hPDI</b>                                                   |                    |              |              |                                                     |                   |                   |                    |                   |
| TD                                                            | 73,309/1,444       | 51,681/993   | 73,831/1,588 | 1.00 (ref.)                                         | 0.89 (0.82, 0.96) | 0.93 (0.87, 1.01) | 0.136              | 0.98 (0.94, 1.01) |
| Hypothyroidism                                                | 73,675/1,356       | 51,962/948   | 74,245/1,524 | 1.00 (ref.)                                         | 0.90 (0.82, 0.98) | 0.96 (0.89, 1.04) | 0.326              | 0.98 (0.95, 1.02) |
| Hyperthyroidism                                               | 76,543/322         | 54,262/222   | 77,966/317   | 1.00 (ref.)                                         | 0.92 (0.77, 1.09) | 0.82 (0.70, 0.97) | 0.018              | 0.91 (0.85, 0.98) |
| <b>uPDI</b>                                                   |                    |              |              |                                                     |                   |                   |                    |                   |
| TD                                                            | 76,841/1,562       | 52,604/1,071 | 69,376/1,392 | 1.00 (ref.)                                         | 1.05 (0.97, 1.14) | 1.09 (1.01, 1.18) | 0.047              | 1.04 (1.01, 1.08) |
| Hypothyroidism                                                | 77,255/1,481       | 52,893/1,011 | 69,734/1,336 | 1.00 (ref.)                                         | 1.05 (0.97, 1.14) | 1.10 (1.02, 1.19) | 0.016              | 1.05 (1.01, 1.09) |
| Hyperthyroidism                                               | 80,915/323         | 55,250/257   | 72,606/281   | 1.00 (ref.)                                         | 1.20 (1.01, 1.42) | 1.04 (0.88, 1.23) | 0.606              | 1.05 (0.98, 1.13) |
| 2) excluding participants with <2 dietary assessment          |                    |              |              |                                                     |                   |                   |                    |                   |
| <b>PDI</b>                                                    |                    |              |              |                                                     |                   |                   |                    |                   |
| TD                                                            | 37,253/728         | 35,400/706   | 47,349/1,062 | 1.00 (ref.)                                         | 0.96 (0.86, 1.06) | 1.02 (0.92, 1.12) | 0.160              | 1.01 (0.97, 1.05) |
| Hypothyroidism                                                | 37,430/677         | 35,589/674   | 47,623/1,037 | 1.00 (ref.)                                         | 0.99 (0.89, 1.10) | 1.09 (0.99, 1.21) | 0.028              | 1.04 (0.99, 1.08) |
| Hyperthyroidism                                               | 72,712/301         | 59,088/259   | 76,971/301   | 1.00 (ref.)                                         | 1.02 (0.86, 1.21) | 0.88 (0.75, 1.04) | 0.127              | 0.96 (0.89, 1.03) |
| <b>hPDI</b>                                                   |                    |              |              |                                                     |                   |                   |                    |                   |
| TD                                                            | 47,652/961         | 31,926/634   | 40,424/901   | 1.00 (ref.)                                         | 0.87 (0.78, 0.96) | 0.90 (0.82, 0.99) | 0.321              | 0.96 (0.92, 1.01) |
| Hypothyroidism                                                | 47,898/915         | 32,101/601   | 40,643/871   | 1.00 (ref.)                                         | 0.87 (0.79, 0.97) | 0.95 (0.86, 1.05) | 0.413              | 0.99 (0.95, 1.04) |
| Hyperthyroidism                                               | 76,543/322         | 54,262/222   | 77,966/317   | 1.00 (ref.)                                         | 0.92 (0.77, 1.09) | 0.82 (0.70, 0.97) | 0.018              | 0.91 (0.85, 0.98) |
| <b>uPDI</b>                                                   |                    |              |              |                                                     |                   |                   |                    |                   |
| TD                                                            | 49,045/1,038       | 32,842/648   | 38,115/810   | 1.00 (ref.)                                         | 0.98 (0.88, 1.08) | 1.11 (1.01, 1.23) | 0.134              | 1.04 (1.00, 1.08) |
| Hypothyroidism                                                | 49,294/988         | 33,037/625   | 38,311/775   | 1.00 (ref.)                                         | 0.99 (0.90, 1.10) | 1.11 (1.01, 1.23) | 0.076              | 1.04 (1.00, 1.09) |

**Table S5** Sensitivity analyses of the associations of plant-based diet indices with the risk of thyroid dysfunction (continued form)

|                                                                                         | Cases/Participants |              |              | Hazard ratio (95% confidence interval) <sup>a</sup> |                   |                   |                    |                   |
|-----------------------------------------------------------------------------------------|--------------------|--------------|--------------|-----------------------------------------------------|-------------------|-------------------|--------------------|-------------------|
|                                                                                         | Tertile 1          | Tertile 2    | Tertile 3    | Tertile 1                                           | Tertile 2         | Tertile 3         | <i>P</i> for trend | Per SD increase   |
| Hyperthyroidism                                                                         | 80,915/323         | 55,250/257   | 72,606/281   | 1.00 (ref.)                                         | 1.20 (1.01, 1.42) | 1.04 (0.88, 1.23) | 0.606              | 1.05 (0.98, 1.13) |
| 3) excluding participants with cancer                                                   |                    |              |              |                                                     |                   |                   |                    |                   |
| <b>PDI</b>                                                                              |                    |              |              |                                                     |                   |                   |                    |                   |
| TD                                                                                      | 64,424/1,263       | 51,678/1,046 | 66,970/1,440 | 1.00 (ref.)                                         | 0.98 (0.91, 1.07) | 1.02 (0.94, 1.10) | 0.378              | 1.00 (0.97, 1.04) |
| Hypothyroidism                                                                          | 64,738/1,185       | 51,943/989   | 67,338/1,392 | 1.00 (ref.)                                         | 1.00 (0.92, 1.09) | 1.06 (0.98, 1.15) | 0.156              | 1.01 (0.98, 1.05) |
| Hyperthyroidism                                                                         | 38,848/170         | 37,124/163   | 49,771/208   | 1.00 (ref.)                                         | 0.95 (0.76, 1.18) | 0.85 (0.68, 1.04) | 0.166              | 0.94 (0.86, 1.03) |
| <b>hPDI</b>                                                                             |                    |              |              |                                                     |                   |                   |                    |                   |
| TD                                                                                      | 67,879/1355        | 47,679/923   | 67,514/1,471 | 1.00 (ref.)                                         | 0.88 (0.81, 0.96) | 0.94 (0.87, 1.01) | 0.195              | 0.98 (0.95, 1.02) |
| Hypothyroidism                                                                          | 68,212/1,274       | 47,930/883   | 67,877/1409  | 1.00 (ref.)                                         | 0.90 (0.82, 0.98) | 0.96 (0.89, 1.04) | 0.414              | 0.99 (0.95, 1.02) |
| Hyperthyroidism                                                                         | 49,655/217         | 33,458/148   | 42,630/176   | 1.00 (ref.)                                         | 0.94 (0.76, 1.16) | 0.79 (0.64, 0.97) | 0.035              | 0.89 (0.81, 0.98) |
| <b>uPDI</b>                                                                             |                    |              |              |                                                     |                   |                   |                    |                   |
| TD                                                                                      | 70,292/1,434       | 48,357/1008  | 64,423/1,307 | 1.00 (ref.)                                         | 1.07 (0.99, 1.16) | 1.10 (1.01, 1.19) | 0.055              | 1.04 (1.01, 1.08) |
| Hypothyroidism                                                                          | 70,647/1,347       | 48,621/959   | 64,751/1,260 | 1.00 (ref.)                                         | 1.09 (1.00, 1.18) | 1.11 (1.03, 1.21) | 0.009              | 1.06 (1.02, 1.09) |
| Hyperthyroidism                                                                         | 51,553/219         | 34,435/163   | 39,755/159   | 1.00 (ref.)                                         | 1.14 (0.93, 1.41) | 1.04 (0.84, 1.29) | 0.743              | 1.05 (0.96, 1.15) |
| 4) further implemented adjustments for NCDs (Hypertension, Diabetes, Hyperlipemia, CVD) |                    |              |              |                                                     |                   |                   |                    |                   |
| <b>PDI</b>                                                                              |                    |              |              |                                                     |                   |                   |                    |                   |
| TD                                                                                      | 69,787/1440        | 56,358/1186  | 73,237/1,657 | 1.00 (ref.)                                         | 0.97 (0.90, 1.05) | 1.02 (0.94, 1.09) | 0.355              | 1.00 (0.97, 1.04) |
| Hypothyroidism                                                                          | 70,134/1357        | 56,658/1,125 | 73,654/1,604 | 1.00 (ref.)                                         | 0.97 (0.90, 1.06) | 1.04 (0.96, 1.12) | 0.149              | 1.01 (0.98, 1.04) |
| Hyperthyroidism                                                                         | 72,899/327         | 59,182/276   | 77,085/332   | 1.00 (ref.)                                         | 0.99 (0.84, 1.17) | 0.87 (0.74, 1.02) | 0.156              | 0.95 (0.88, 1.01) |
| <b>hPDI</b>                                                                             |                    |              |              |                                                     |                   |                   |                    |                   |
| TD                                                                                      | 73,507/1539        | 51,827/1054  | 74,048/1,690 | 1.00 (ref.)                                         | 0.88 (0.82, 0.96) | 0.93 (0.87, 1.00) | 0.108              | 0.97 (0.94, 1.01) |
| Hypothyroidism                                                                          | 73,877/1,453       | 52,108/1,008 | 74,461/1,625 | 1.00 (ref.)                                         | 0.89 (0.82, 0.97) | 0.95 (0.88, 1.02) | 0.260              | 0.98 (0.94, 1.01) |
| Hyperthyroidism                                                                         | 76,680/347         | 54,365/237   | 78,121/351   | 1.00 (ref.)                                         | 0.90 (0.76, 1.07) | 0.84 (0.72, 0.98) | 0.041              | 0.93 (0.88, 1.00) |
| <b>uPDI</b>                                                                             |                    |              |              |                                                     |                   |                   |                    |                   |
| TD                                                                                      | 69,787/1440        | 56,358/1,186 | 73,237/1,657 | 1.00 (ref.)                                         | 1.05 (0.97, 1.14) | 1.11 (1.03, 1.20) | 0.014              | 1.05 (1.02, 1.08) |

**Table S5** Sensitivity analyses of the associations of plant-based diet indices with the risk of thyroid dysfunction (continued form)

|                 | Cases/Participants |              |              | Hazard ratio (95% confidence interval) <sup>a</sup> |                   |                   |                    |                   |
|-----------------|--------------------|--------------|--------------|-----------------------------------------------------|-------------------|-------------------|--------------------|-------------------|
|                 | Tertile 1          | Tertile 2    | Tertile 3    | Tertile 1                                           | Tertile 2         | Tertile 3         | <i>P</i> for trend | Per SD increase   |
| Hypothyroidism  | 77,439/1,559       | 53,027/1,079 | 69,980/1,448 | 1.00 (ref.)                                         | 1.06 (0.98, 1.15) | 1.14 (1.06, 1.23) | 0.002              | 1.06 (1.03, 1.10) |
| Hyperthyroidism | 81,064/361         | 55,336/274   | 72,766/300   | 1.00 (ref.)                                         | 1.14 (0.97, 1.34) | 1.00 (0.85, 1.18) | 0.980              | 1.04 (0.97, 1.12) |

Abbreviations: BMI, body mass index; CVD, Cardiovascular Disease; hPDI, healthful plant-based diet index; PA, physical activity; PDI, plant-based diet index; TD, thyroid dysfunction; TDI, Townsend deprivation index; uPDI, unhealthful plant-based diet index.

<sup>a</sup> Multivariable Cox proportional regression model was adjusted for age, sex, BMI, TDI, ethnic background, education levels, smoking status, drinking status, PM<sub>2.5</sub>, total energy intake, PA, household income, and iodine intake.

## Figure legends

**Figure S1.** Flow chart of participants included in the present UK Biobank study.

Abbreviations: TD, thyroid dysfunction.

**Figure S2.** Restrict cubic spline for the associations of the three plant-based diet indices with the risk of hypothyroidism and hyperthyroidism.

Linear association between PDIs and the risk of TD, hypothyroidism, and hyperthyroidism using restricted cubic splines with 3 knots in the UK Biobank cohort. The lowest value of PDIs was used as the reference value. Adjusted for age, sex, PA, BMI, ethnic, and iodine consumption.

Abbreviations: BMI, body mass index; CI, confidence interval; hPDI, healthful plant-based diet index; HR, hazard ratio; PA, physical activity; TD, thyroid dysfunction; uPDI, unhealthful plant-based diet index.

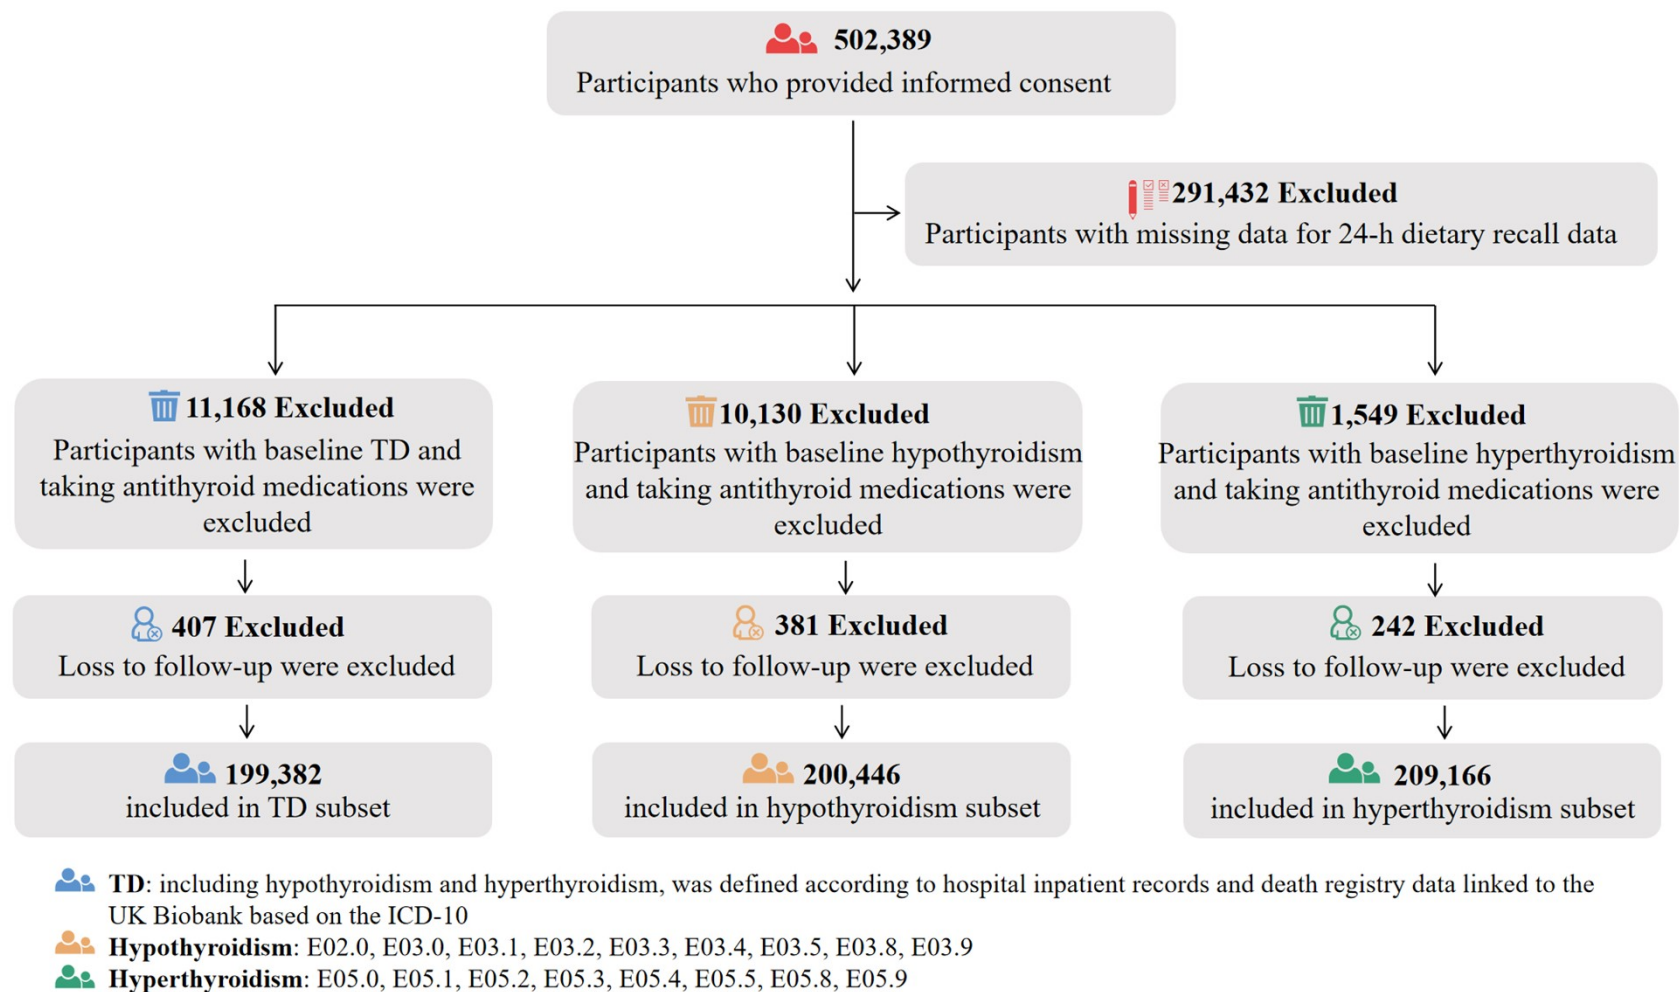

**Figure S1.** Flow chart of participants included in the present UK Biobank study

## A. Hypothyroidism

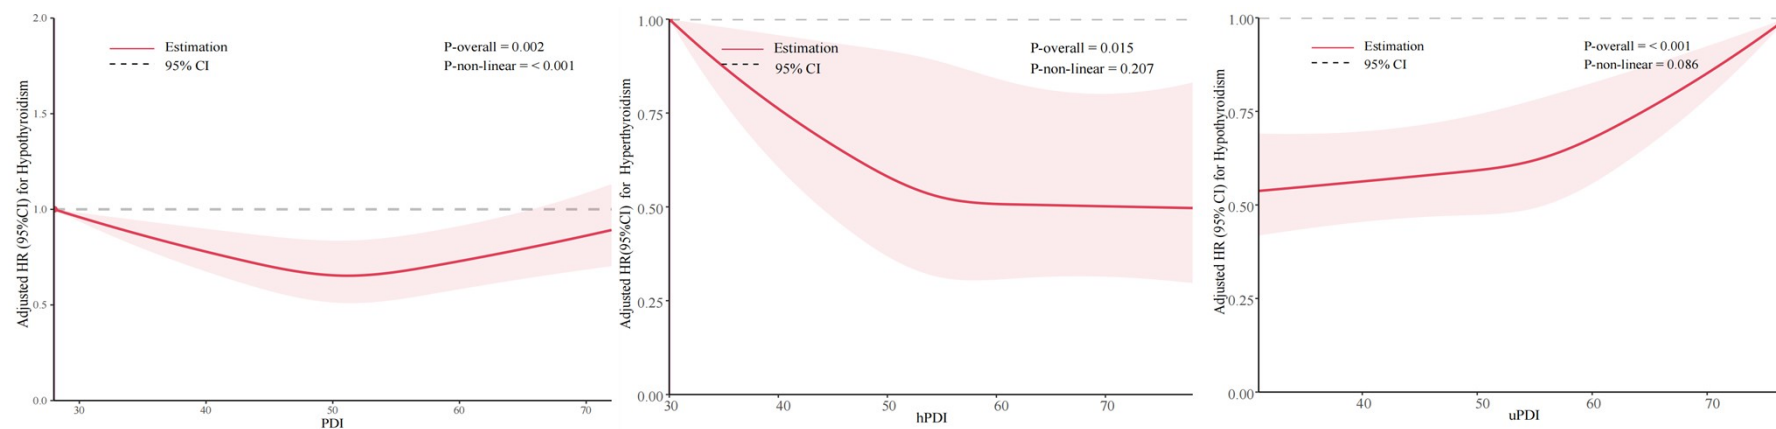

## B. Hyperthyroidism

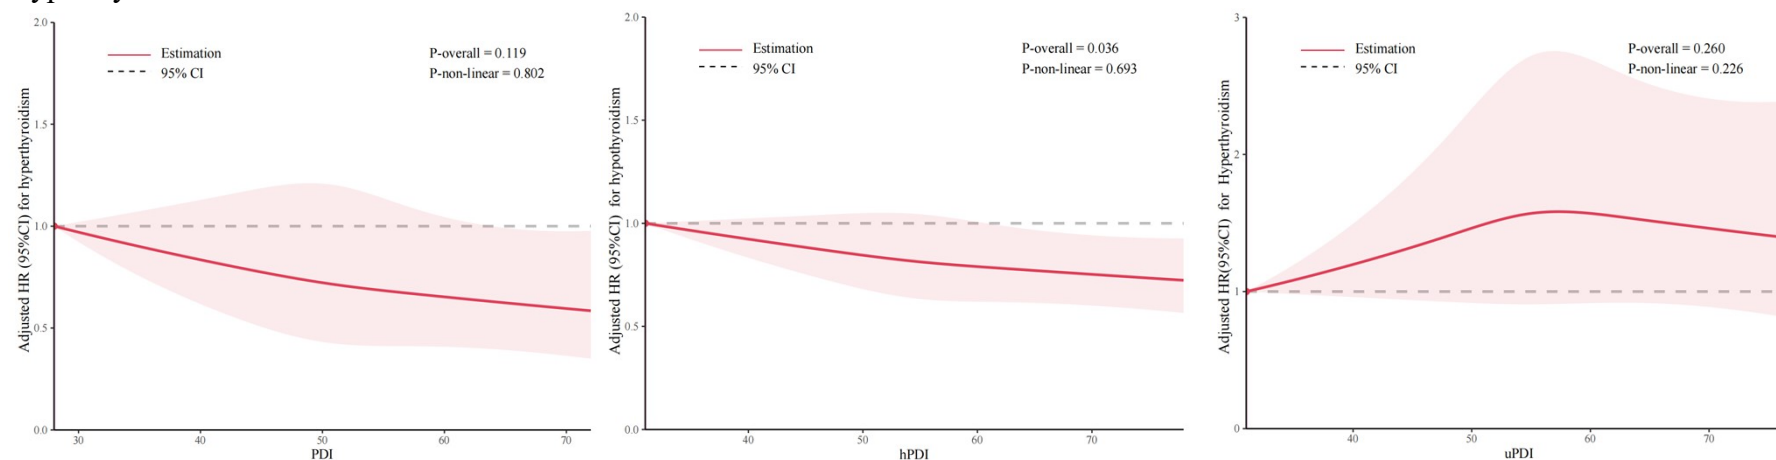

**Figure S2.** Restrict cubic spline for the associations of the three plant-based diet indices with the risk of hypothyroidism and hyperthyroidism
